# Supplementary material for: Two pairs of Zn(ii) coordination polymer enantiomers based on chiral aromatic polycarboxylate ligands: synthesis, crystal structures and properties
Source: Royal Society of Chemistry journal article supplement (doi:10.1039/c7ra00337d), 2017-01-01
Supplement: c7ra00337d1.pdf [file c7ra00337d1.pdf]

# Two Pairs of Zn(II) Coordination Polymer Enantiomers Based on Chiral Aromatic Polycarboxylate Ligands: Synthesis, Crystal Structures and Properties

*Ji-Han Huang<sup>a,b</sup>, Guang-Feng Hou<sup>b</sup>, Dong-Sheng Ma, Ying-Hui Yu<sup>a\*</sup>, Wen-Hong Jiang, Qi Huang, Jin-Sheng Gao<sup>a,b\*</sup>*

<sup>a</sup>School of Chemistry and Materials Science, Heilongjiang University, Harbin 150080, China.

<sup>b</sup>Engineering Research Center of Pesticide of Heilongjiang University, Heilongjiang University, Harbin 150080, China.

**Corresponding Author.** \*Tel.: +86 451 86609001; Fax: +86 451 86609151; E-mail: yuyinghui@hlju.edu.cn (Y. H. Yu); gaojinsheng@hlju.edu.cn (J. S. Gao).

**Table S1.** Selected bond distances (Å) and angles (°) for **CCPs 1–4**

**Table S2.** H-bond distances (Å) and angles (°) in complex **CCPs 1–4**

**Figure S1.** The IR spectra of **CCP-1**

**Figure S2.** The IR spectra of **CCP-2**

**Figure S3.** The IR spectra of **CCP-3**

**Figure S4.** The IR spectra of **CCP-4**

**Figure S5.** PXRD patterns of **CCP-1 and CCP-2**

**Figure S6.** PXRD patterns of **CCP-3 and CCP-4**

**Figure S7.** TGA curves of **CCP-1**

**Figure S8.** TGA curves of **CCP-2**

**Figure S9.** TGA curves of **CCP-3**

**Figure S10.** TGA curves of **CCP-4**

**Figure S11.** Solid-state UV-Vis of **CCP-1 and CCP-2**

**Figure S12.** Solid-state UV-Vis of **CCP-3 and CCP-4**

**Figure S13.** Excitation spectra of (R)-H<sub>2</sub>cba

**Figure S14.** Excitation spectra of **CCP-1**

**Figure S15.** Excitation spectra of (R)-H<sub>2</sub>cna

**Figure S16.** Excitation spectra of **CCP-3****Table S1.** Selected bond distances (Å) and angles (°) for **CCPs 1–4**

| CCP-1           |          |                |          |
|-----------------|----------|----------------|----------|
| C(1)-O(3)       | 1.374(4) | C(1)-C(2)      | 1.376(6) |
| C(1)-C(6)       | 1.389(6) | C(2)-C(3)      | 1.377(5) |
| C(2)-H(2)       | 0.9300   | C(3)-C(4)      | 1.395(6) |
| C(3)-H(3)       | 0.9300   | C(4)-C(5)      | 1.395(6) |
| C(4)-C(7)       | 1.492(4) | C(5)-C(6)      | 1.387(5) |
| C(5)-H(5)       | 0.9300   | C(6)-H(6)      | 0.9300   |
| C(7)-C(8)       | 1.392(6) | C(7)-C(12)     | 1.398(5) |
| C(8)-C(9)       | 1.383(5) | C(8)-H(8)      | 0.9300   |
| C(9)-C(10)      | 1.383(6) | C(9)-H(9)      | 0.9300   |
| C(10)-C(11)     | 1.392(5) | C(10)-C(16)    | 1.489(4) |
| C(11)-C(12)     | 1.376(5) | C(11)-H(11)    | 0.9300   |
| C(12)-H(12)     | 0.9300   | C(13)-O(1)     | 1.246(5) |
| C(13)-O(2)      | 1.267(5) | C(13)-C(14)    | 1.525(5) |
| C(14)-O(3)      | 1.440(5) | C(14)-C(15)    | 1.520(6) |
| C(14)-H(14)     | 0.9800   | C(15)-H(15A)   | 0.9600   |
| C(15)-H(15B)    | 0.9600   | C(15)-H(15C)   | 0.9600   |
| C(16)-O(4)      | 1.257(5) | C(16)-O(5)     | 1.257(5) |
| C(16)-Zn(1)#III | 2.541(3) | Zn(1)-O(6)     | 1.963(3) |
| Zn(1)-O(2)      | 1.972(2) | Zn(1)-O(5)#II  | 1.996(3) |
| Zn(1)-O(1)#I    | 2.022(3) | Zn(1)-O(4)#II  | 2.398(3) |
| Zn(1)-C(16)#II  | 2.541(3) | O(1)-Zn(1)#IV  | 2.022(3) |
| O(4)-Zn(1)#III  | 2.398(3) | O(5)-Zn(1)#III | 1.996(3) |
| O(6)-H(61)      | 0.8540   | O(6)-H(62)     | 0.8459   |
| O(3)-C(1)-C(2)  | 116.2(4) | O(3)-C(1)-C(6) | 124.7(4) |
| C(2)-C(1)-C(6)  | 119.0(3) | C(1)-C(2)-C(3) | 121.0(4) |
| C(1)-C(2)-H(2)  | 119.5    | C(3)-C(2)-H(2) | 119.5    |
| C(2)-C(3)-C(4)  | 121.8(4) | C(2)-C(3)-H(3) | 119.1    |
| C(4)-C(3)-H(3)  | 119.1    | C(5)-C(4)-C(3) | 116.2(3) |
| C(5)-C(4)-C(7)  | 122.1(4) | C(3)-C(4)-C(7) | 121.7(4) |
| C(6)-C(5)-C(4)  | 122.5(4) | C(6)-C(5)-H(5) | 118.8    |
| C(4)-C(5)-H(5)  | 118.8    | C(5)-C(6)-C(1) | 119.5(4) |
| C(5)-C(6)-H(6)  | 120.2    | C(1)-C(6)-H(6) | 120.2    |
| C(8)-C(7)-C(12) | 116.4(3) | C(8)-C(7)-C(4) | 121.5(4) |

|                                                                                                                                          |            |                        |            |
|------------------------------------------------------------------------------------------------------------------------------------------|------------|------------------------|------------|
| C(12)-C(7)-C(4)                                                                                                                          | 122.1(3)   | C(9)-C(8)-C(7)         | 121.8(4)   |
| C(9)-C(8)-H(8)                                                                                                                           | 119.1      | C(7)-C(8)-H(8)         | 119.1      |
| C(10)-C(9)-C(8)                                                                                                                          | 120.9(4)   | C(10)-C(9)-H(9)        | 119.5      |
| C(8)-C(9)-H(9)                                                                                                                           | 119.5      | C(9)-C(10)-C(11)       | 118.1(3)   |
| C(9)-C(10)-C(16)                                                                                                                         | 119.7(4)   | C(11)-C(10)-C(16)      | 122.1(4)   |
| C(12)-C(11)-C(10)                                                                                                                        | 120.7(4)   | C(12)-C(11)-H(11)      | 119.7      |
| C(10)-C(11)-H(11)                                                                                                                        | 119.7      | C(11)-C(12)-C(7)       | 122.0(4)   |
| C(11)-C(12)-H(12)                                                                                                                        | 119.0      | C(7)-C(12)-H(12)       | 119.0      |
| O(1)-C(13)-O(2)                                                                                                                          | 123.1(3)   | O(1)-C(13)-C(14)       | 120.5(3)   |
| O(2)-C(13)-C(14)                                                                                                                         | 116.3(3)   | O(3)-C(14)-C(15)       | 109.5(4)   |
| O(3)-C(14)-C(13)                                                                                                                         | 106.7(3)   | C(15)-C(14)-C(13)      | 109.0(3)   |
| O(3)-C(14)-H(14)                                                                                                                         | 110.5      | C(15)-C(14)-H(14)      | 110.5      |
| C(13)-C(14)-H(14)                                                                                                                        | 110.5      | C(14)-C(15)-H(15A)     | 109.5      |
| C(14)-C(15)-H(15B)                                                                                                                       | 109.5      | H(15A)-C(15)-H(15B)    | 109.5      |
| C(14)-C(15)-H(15C)                                                                                                                       | 109.5      | H(15A)-C(15)-H(15C)    | 109.5      |
| H(15B)-C(15)-H(15C)                                                                                                                      | 109.5      | O(4)-C(16)-O(5)        | 119.6(3)   |
| O(4)-C(16)-C(10)                                                                                                                         | 121.3(4)   | O(5)-C(16)-C(10)       | 119.0(4)   |
| O(4)-C(16)-Zn(1)#III                                                                                                                     | 69.02(19)  | O(5)-C(16)-Zn(1)#III   | 50.62(17)  |
| C(10)-C(16)-Zn(1)#III                                                                                                                    | 169.5(3)   | O(6)-Zn(1)-O(2)        | 112.52(13) |
| O(6)-Zn(1)-O(5)#II                                                                                                                       | 105.04(14) | O(2)-Zn(1)-O(5)#II     | 138.45(12) |
| O(6)-Zn(1)-O(1)#I                                                                                                                        | 106.01(14) | O(2)-Zn(1)-O(1)#I      | 89.07(13)  |
| O(5)#II-Zn(1)-O(1)#I                                                                                                                     | 97.29(12)  | O(6)-Zn(1)-O(4)#II     | 112.59(13) |
| O(2)-Zn(1)-O(4)#II                                                                                                                       | 90.26(11)  | O(5)#II-Zn(1)-O(4)#II  | 58.44(11)  |
| O(1)#I-Zn(1)-O(4)#II                                                                                                                     | 138.33(13) | O(6)-Zn(1)-C(16)#II    | 111.69(14) |
| O(2)-Zn(1)-C(16)#II                                                                                                                      | 115.60(11) | O(5)#II-Zn(1)-C(16)#II | 29.13(13)  |
| O(1)#I-Zn(1)-C(16)#II                                                                                                                    | 119.94(15) | O(4)#II-Zn(1)-C(16)#II | 29.31(12)  |
| C(13)-O(1)-Zn(1)#IV                                                                                                                      | 136.9(3)   | C(13)-O(2)-Zn(1)       | 119.7(3)   |
| C(1)-O(3)-C(14)                                                                                                                          | 118.6(4)   | C(16)-O(4)-Zn(1)#III   | 81.7(2)    |
| C(16)-O(5)-Zn(1)#III                                                                                                                     | 100.2(2)   | Zn(1)-O(6)-H(61)       | 123.4      |
| Zn(1)-O(6)-H(62)                                                                                                                         | 119.1      | H(61)-O(6)-H(62)       | 113.0      |
| Symmetry transformations used to generate equivalent atoms:<br>#I -x,y,-1/2,-z+1    #II x-1,y,z-1    #III x+1,y,z+1    #IV -x,y+1/2,-z+1 |            |                        |            |
| CCP-2                                                                                                                                    |            |                        |            |
| C(1)-O(3)                                                                                                                                | 1.369(3)   | C(1)-C(2)              | 1.375(5)   |
| C(1)-C(6)                                                                                                                                | 1.394(5)   | C(2)-C(3)              | 1.374(5)   |
| C(2)-H(2)                                                                                                                                | 0.9300     | C(3)-C(4)              | 1.402(4)   |
| C(3)-H(3)                                                                                                                                | 0.9300     | C(4)-C(5)              | 1.390(5)   |
| C(4)-C(7)                                                                                                                                | 1.486(4)   | C(5)-C(6)              | 1.382(5)   |
| C(5)-H(5)                                                                                                                                | 0.9300     | C(6)-H(6)              | 0.9300     |
| C(7)-C(8)                                                                                                                                | 1.393(5)   | C(7)-C(12)             | 1.406(4)   |
| C(8)-C(9)                                                                                                                                | 1.381(5)   | C(8)-H(8)              | 0.9300     |
| C(9)-C(10)                                                                                                                               | 1.387(5)   | C(9)-H(9)              | 0.9300     |

|                       |            |                      |            |
|-----------------------|------------|----------------------|------------|
| C(10)-C(11)           | 1.386(5)   | C(10)-C(16)          | 1.484(4)   |
| C(11)-C(12)           | 1.377(5)   | C(11)-H(11)          | 0.9300     |
| C(12)-H(12)           | 0.9300     | C(13)-O(1)           | 1.253(3)   |
| C(13)-O(2)            | 1.257(4)   | C(13)-C(14)          | 1.523(4)   |
| C(14)-O(3)            | 1.444(4)   | C(14)-C(15)          | 1.502(5)   |
| C(14)-H(14)           | 0.9800     | C(15)-H(15A)         | 0.9600     |
| C(15)-H(15B)          | 0.9600     | C(15)-H(15C)         | 0.9600     |
| C(16)-O(4)            | 1.256(4)   | C(16)-O(5)           | 1.259(4)   |
| C(16)-Zn(1)#III       | 2.539(3)   | Zn(1)-O(6)           | 1.958(2)   |
| Zn(1)-O(2)            | 1.9713(17) | Zn(1)-O(5)#II        | 1.993(2)   |
| Zn(1)-O(1)#I          | 2.021(2)   | Zn(1)-O(4)#II        | 2.390(3)   |
| Zn(1)-C(16)#II        | 2.539(3)   | O(1)-Zn(1)#IV        | 2.021(2)   |
| O(4)-Zn(1)#III        | 2.390(3)   | O(5)-Zn(1)#III       | 1.993(2)   |
| O(6)-H(61)            | 0.8543     | O(6)-H(62)           | 0.8465     |
| O(3)-C(1)-C(2)        | 116.0(3)   | O(3)-C(1)-C(6)       | 124.6(3)   |
| C(2)-C(1)-C(6)        | 119.3(3)   | C(3)-C(2)-C(1)       | 120.4(3)   |
| C(3)-C(2)-H(2)        | 119.8      | C(1)-C(2)-H(2)       | 119.8      |
| C(2)-C(3)-C(4)        | 122.0(3)   | C(2)-C(3)-H(3)       | 119.0      |
| C(4)-C(3)-H(3)        | 119.0      | C(5)-C(4)-C(3)       | 116.2(3)   |
| C(5)-C(4)-C(7)        | 122.4(3)   | C(3)-C(4)-C(7)       | 121.4(3)   |
| C(6)-C(5)-C(4)        | 122.5(3)   | C(6)-C(5)-H(5)       | 118.8      |
| C(4)-C(5)-H(5)        | 118.8      | C(5)-C(6)-C(1)       | 119.5(3)   |
| C(5)-C(6)-H(6)        | 120.2      | C(1)-C(6)-H(6)       | 120.2      |
| C(8)-C(7)-C(12)       | 116.6(3)   | C(8)-C(7)-C(4)       | 121.5(3)   |
| C(12)-C(7)-C(4)       | 121.9(3)   | C(9)-C(8)-C(7)       | 121.5(3)   |
| C(9)-C(8)-H(8)        | 119.2      | C(7)-C(8)-H(8)       | 119.2      |
| C(8)-C(9)-C(10)       | 121.0(3)   | C(8)-C(9)-H(9)       | 119.5      |
| C(10)-C(9)-H(9)       | 119.5      | C(11)-C(10)-C(9)     | 118.4(3)   |
| C(11)-C(10)-C(16)     | 121.7(3)   | C(9)-C(10)-C(16)     | 119.8(3)   |
| C(12)-C(11)-C(10)     | 120.6(3)   | C(12)-C(11)-H(11)    | 119.7      |
| C(10)-C(11)-H(11)     | 119.7      | C(11)-C(12)-C(7)     | 121.9(3)   |
| C(11)-C(12)-H(12)     | 119.1      | C(7)-C(12)-H(12)     | 119.1      |
| O(1)-C(13)-O(2)       | 122.7(3)   | O(1)-C(13)-C(14)     | 120.0(2)   |
| O(2)-C(13)-C(14)      | 117.3(2)   | O(3)-C(14)-C(15)     | 110.4(3)   |
| O(3)-C(14)-C(13)      | 106.0(2)   | C(15)-C(14)-C(13)    | 109.5(3)   |
| O(3)-C(14)-H(14)      | 110.3      | C(15)-C(14)-H(14)    | 110.3      |
| C(13)-C(14)-H(14)     | 110.3      | C(14)-C(15)-H(15A)   | 109.5      |
| C(14)-C(15)-H(15B)    | 109.5      | H(15A)-C(15)-H(15B)  | 109.5      |
| C(14)-C(15)-H(15C)    | 109.5      | H(15A)-C(15)-H(15C)  | 109.5      |
| H(15B)-C(15)-H(15C)   | 109.5      | O(4)-C(16)-O(5)      | 119.3(3)   |
| O(4)-C(16)-C(10)      | 121.9(3)   | O(5)-C(16)-C(10)     | 118.8(3)   |
| O(4)-C(16)-Zn(1)#III  | 68.74(18)  | O(5)-C(16)-Zn(1)#III | 50.55(15)  |
| C(10)-C(16)-Zn(1)#III | 169.2(2)   | O(6)-Zn(1)-O(2)      | 112.32(11) |

|                                                                                                                                             |            |                        |            |
|---------------------------------------------------------------------------------------------------------------------------------------------|------------|------------------------|------------|
| O(6)-Zn(1)-O(5)#II                                                                                                                          | 105.09(11) | O(2)-Zn(1)-O(5)#II     | 138.54(10) |
| O(6)-Zn(1)-O(1)#I                                                                                                                           | 106.26(11) | O(2)-Zn(1)-O(1)#I      | 89.32(10)  |
| O(5)#II-Zn(1)-O(1)#I                                                                                                                        | 97.00(9)   | O(6)-Zn(1)-O(4)#II     | 112.27(10) |
| O(2)-Zn(1)-O(4)#II                                                                                                                          | 90.31(9)   | O(5)#II-Zn(1)-O(4)#II  | 58.53(9)   |
| O(1)#I-Zn(1)-O(4)#II                                                                                                                        | 138.35(10) | O(6)-Zn(1)-C(16)#II    | 111.33(11) |
| O(2)-Zn(1)-C(16)#II                                                                                                                         | 115.76(9)  | O(5)#II-Zn(1)-C(16)#II | 29.21(10)  |
| O(1)#I-Zn(1)-C(16)#II                                                                                                                       | 119.95(11) | O(4)#II-Zn(1)-C(16)#II | 29.31(10)  |
| C(13)-O(1)-Zn(1)#IV                                                                                                                         | 136.9(2)   | C(13)-O(2)-Zn(1)       | 120.5(2)   |
| C(1)-O(3)-C(14)                                                                                                                             | 119.1(3)   | C(16)-O(4)-Zn(1)#III   | 81.95(19)  |
| C(16)-O(5)-Zn(1)#III                                                                                                                        | 100.2(2)   | Zn(1)-O(6)-H(61)       | 123.4      |
| Zn(1)-O(6)-H(62)                                                                                                                            | 119.2      | H(61)-O(6)-H(62)       | 113.1      |
| Symmetry transformations used to generate equivalent atoms:<br>#I -x+2,y+1/2,-z+1    #II x+1,y,z+1    #III x-1,y,z-1    #IV -x+2,y-1/2,-z+1 |            |                        |            |
| CCP-3                                                                                                                                       |            |                        |            |
| C(1)-C(10)                                                                                                                                  | 1.417(3)   | C(1)-C(6)              | 1.419(3)   |
| C(1)-C(2)                                                                                                                                   | 1.420(3)   | C(2)-C(3)              | 1.364(3)   |
| C(2)-H(2)                                                                                                                                   | 0.9300     | C(3)-O(1)              | 1.394(3)   |
| C(3)-C(4)                                                                                                                                   | 1.403(3)   | C(4)-C(5)              | 1.363(3)   |
| C(4)-H(4)                                                                                                                                   | 0.9300     | C(5)-C(6)              | 1.411(3)   |
| C(5)-H(5)                                                                                                                                   | 0.9300     | C(6)-C(7)              | 1.416(3)   |
| C(7)-C(8)                                                                                                                                   | 1.364(3)   | C(7)-H(7)              | 0.9300     |
| C(8)-C(9)                                                                                                                                   | 1.419(3)   | C(8)-C(11)             | 1.501(3)   |
| C(9)-C(10)                                                                                                                                  | 1.358(3)   | C(9)-H(9)              | 0.9300     |
| C(10)-H(10)                                                                                                                                 | 0.9300     | C(11)-O(5)             | 1.235(3)   |
| C(11)-O(4)                                                                                                                                  | 1.257(3)   | C(12)-O(1)             | 1.444(3)   |
| C(12)-C(14)                                                                                                                                 | 1.514(4)   | C(12)-C(13)            | 1.524(3)   |
| C(12)-H(12)                                                                                                                                 | 0.9800     | C(13)-O(3)             | 1.241(3)   |
| C(13)-O(2)                                                                                                                                  | 1.252(3)   | C(14)-H(14A)           | 0.9600     |
| C(14)-H(14B)                                                                                                                                | 0.9600     | C(14)-H(14C)           | 0.9600     |
| O(1)-Zn(1)                                                                                                                                  | 2.4146(18) | O(2)-Zn(1)             | 1.964(2)   |
| O(4)-Zn(1)#II                                                                                                                               | 1.9354(18) | O(6)-Zn(1)             | 1.9884(18) |
| O(6)-H(61)                                                                                                                                  | 0.8499     | O(6)-H(62)             | 0.8500     |
| O(7)-Zn(1)                                                                                                                                  | 2.013(2)   | O(7)-H(71)             | 0.8499     |
| O(7)-H(72)                                                                                                                                  | 0.8500     | Zn(1)-O(4)#I           | 1.9354(18) |
| C(10)-C(1)-C(6)                                                                                                                             | 118.34(19) | C(10)-C(1)-C(2)        | 122.6(2)   |
| C(6)-C(1)-C(2)                                                                                                                              | 119.03(19) | C(3)-C(2)-C(1)         | 119.1(2)   |
| C(3)-C(2)-H(2)                                                                                                                              | 120.5      | C(1)-C(2)-H(2)         | 120.5      |
| C(2)-C(3)-O(1)                                                                                                                              | 118.3(2)   | C(2)-C(3)-C(4)         | 122.2(2)   |
| O(1)-C(3)-C(4)                                                                                                                              | 119.4(2)   | C(5)-C(4)-C(3)         | 119.7(2)   |
| C(5)-C(4)-H(4)                                                                                                                              | 120.2      | C(3)-C(4)-H(4)         | 120.2      |
| C(4)-C(5)-C(6)                                                                                                                              | 120.4(2)   | C(4)-C(5)-H(5)         | 119.8      |

|                                                                                                                        |            |                     |            |
|------------------------------------------------------------------------------------------------------------------------|------------|---------------------|------------|
| C(6)-C(5)-H(5)                                                                                                         | 119.8      | C(5)-C(6)-C(7)      | 121.1(2)   |
| C(5)-C(6)-C(1)                                                                                                         | 119.6(2)   | C(7)-C(6)-C(1)      | 119.34(19) |
| C(8)-C(7)-C(6)                                                                                                         | 120.5(2)   | C(8)-C(7)-H(7)      | 119.7      |
| C(6)-C(7)-H(7)                                                                                                         | 119.7      | C(7)-C(8)-C(9)      | 120.3(2)   |
| C(7)-C(8)-C(11)                                                                                                        | 117.8(2)   | C(9)-C(8)-C(11)     | 121.9(2)   |
| C(10)-C(9)-C(8)                                                                                                        | 120.0(2)   | C(10)-C(9)-H(9)     | 120.0      |
| C(8)-C(9)-H(9)                                                                                                         | 120.0      | C(9)-C(10)-C(1)     | 121.4(2)   |
| C(9)-C(10)-H(10)                                                                                                       | 119.3      | C(1)-C(10)-H(10)    | 119.3      |
| O(5)-C(11)-O(4)                                                                                                        | 121.3(2)   | O(5)-C(11)-C(8)     | 120.5(2)   |
| O(4)-C(11)-C(8)                                                                                                        | 117.9(2)   | O(1)-C(12)-C(14)    | 108.7(2)   |
| O(1)-C(12)-C(13)                                                                                                       | 108.3(2)   | C(14)-C(12)-C(13)   | 111.8(2)   |
| O(1)-C(12)-H(12)                                                                                                       | 109.3      | C(14)-C(12)-H(12)   | 109.3      |
| C(13)-C(12)-H(12)                                                                                                      | 109.3      | O(3)-C(13)-O(2)     | 122.3(2)   |
| O(3)-C(13)-C(12)                                                                                                       | 117.1(2)   | O(2)-C(13)-C(12)    | 120.6(2)   |
| C(12)-C(14)-H(14A)                                                                                                     | 109.5      | C(12)-C(14)-H(14B)  | 109.5      |
| H(14A)-C(14)-H(14B)                                                                                                    | 109.5      | C(12)-C(14)-H(14C)  | 109.5      |
| H(14A)-C(14)-H(14C)                                                                                                    | 109.5      | H(14B)-C(14)-H(14C) | 109.5      |
| C(3)-O(1)-C(12)                                                                                                        | 115.68(19) | C(3)-O(1)-Zn(1)     | 122.35(15) |
| C(12)-O(1)-Zn(1)                                                                                                       | 109.50(13) | C(13)-O(2)-Zn(1)    | 126.03(17) |
| C(11)-O(4)-Zn(1)#II                                                                                                    | 108.36(16) | Zn(1)-O(6)-H(61)    | 114.1      |
| Zn(1)-O(6)-H(62)                                                                                                       | 118.7      | H(61)-O(6)-H(62)    | 110.4      |
| Zn(1)-O(7)-H(71)                                                                                                       | 124.3      | Zn(1)-O(7)-H(72)    | 122.4      |
| H(71)-O(7)-H(72)                                                                                                       | 112.8      | O(4)#I-Zn(1)-O(2)   | 142.59(10) |
| O(4)#I-Zn(1)-O(6)                                                                                                      | 102.92(8)  | O(2)-Zn(1)-O(6)     | 106.87(10) |
| O(4)#I-Zn(1)-O(7)                                                                                                      | 108.91(10) | O(2)-Zn(1)-O(7)     | 90.40(9)   |
| O(6)-Zn(1)-O(7)                                                                                                        | 95.41(9)   | O(4)#I-Zn(1)-O(1)   | 86.01(7)   |
| O(2)-Zn(1)-O(1)                                                                                                        | 73.17(8)   | O(6)-Zn(1)-O(1)     | 87.83(7)   |
| O(7)-Zn(1)-O(1)                                                                                                        | 163.47(8)  |                     |            |
| Symmetry transformations used to generate equivalent atoms:<br>#I -x,y-1/2,-z+1                      #II -x,y+1/2,-z+1 |            |                     |            |
| CCP-4                                                                                                                  |            |                     |            |
| C(1)-O(2)                                                                                                              | 1.240(8)   | C(1)-O(1)           | 1.264(8)   |
| C(1)-C(2)                                                                                                              | 1.492(8)   | C(2)-C(7)           | 1.356(8)   |
| C(2)-C(3)                                                                                                              | 1.413(8)   | C(3)-C(4)           | 1.374(8)   |
| C(4)-C(5)                                                                                                              | 1.420(8)   | C(5)-C(11)          | 1.410(7)   |
| C(5)-C(6)                                                                                                              | 1.423(7)   | C(6)-C(8)           | 1.408(8)   |
| C(6)-C(7)                                                                                                              | 1.414(7)   | C(8)-C(9)           | 1.371(8)   |
| C(9)-C(10)                                                                                                             | 1.404(8)   | C(10)-C(11)         | 1.358(8)   |
| C(10)-O(3)                                                                                                             | 1.404(6)   | C(12)-O(3)          | 1.445(7)   |
| C(12)-C(13)                                                                                                            | 1.496(9)   | C(12)-C(14)         | 1.530(8)   |
| C(14)-O(5)                                                                                                             | 1.238(7)   | C(14)-O(4)          | 1.256(8)   |

|                                                                                                          |           |                    |            |
|----------------------------------------------------------------------------------------------------------|-----------|--------------------|------------|
| O(1)-Zn(1)#II                                                                                            | 1.941(4)  | O(3)-Zn(1)         | 2.413(4)   |
| O(4)-Zn(1)                                                                                               | 1.968(5)  | O(6)-Zn(1)         | 2.017(5)   |
| O(7)-Zn(1)                                                                                               | 1.984(4)  | Zn(1)-O(1)#I       | 1.941(4)   |
| O(2)-C(1)-O(1)                                                                                           | 120.5(5)  | O(2)-C(1)-C(2)     | 121.9(5)   |
| O(1)-C(1)-C(2)                                                                                           | 117.2(5)  | C(7)-C(2)-C(3)     | 119.9(5)   |
| C(7)-C(2)-C(1)                                                                                           | 119.2(5)  | C(3)-C(2)-C(1)     | 120.9(5)   |
| C(4)-C(3)-C(2)                                                                                           | 120.1(5)  | C(3)-C(4)-C(5)     | 121.0(5)   |
| C(11)-C(5)-C(4)                                                                                          | 122.9(5)  | C(11)-C(5)-C(6)    | 118.7(5)   |
| C(4)-C(5)-C(6)                                                                                           | 118.4(5)  | C(8)-C(6)-C(7)     | 121.6(5)   |
| C(8)-C(6)-C(5)                                                                                           | 119.7(5)  | C(7)-C(6)-C(5)     | 118.7(5)   |
| C(2)-C(7)-C(6)                                                                                           | 121.8(5)  | C(9)-C(8)-C(6)     | 120.5(5)   |
| C(8)-C(9)-C(10)                                                                                          | 118.9(5)  | C(11)-C(10)-O(3)   | 119.0(5)   |
| C(11)-C(10)-C(9)                                                                                         | 122.5(5)  | O(3)-C(10)-C(9)    | 118.4(5)   |
| C(10)-C(11)-C(5)                                                                                         | 119.6(5)  | O(3)-C(12)-C(13)   | 109.2(5)   |
| O(3)-C(12)-C(14)                                                                                         | 108.2(5)  | C(13)-C(12)-C(14)  | 111.7(5)   |
| O(5)-C(14)-O(4)                                                                                          | 122.3(5)  | O(5)-C(14)-C(12)   | 116.9(6)   |
| O(4)-C(14)-C(12)                                                                                         | 120.7(5)  | C(1)-O(1)-Zn(1)#II | 108.4(4)   |
| C(10)-O(3)-C(12)                                                                                         | 116.2(5)  | C(10)-O(3)-Zn(1)   | 122.4(4)   |
| C(12)-O(3)-Zn(1)                                                                                         | 109.5(3)  | C(14)-O(4)-Zn(1)   | 125.5(4)   |
| O(1)#I-Zn(1)-O(4)                                                                                        | 142.4(2)  | O(1)#I-Zn(1)-O(7)  | 103.23(19) |
| O(4)-Zn(1)-O(7)                                                                                          | 106.9(2)  | O(1)#I-Zn(1)-O(6)  | 109.0(2)   |
| O(4)-Zn(1)-O(6)                                                                                          | 89.9(2)   | O(7)-Zn(1)-O(6)    | 95.7(2)    |
| O(1)#I-Zn(1)-O(3)                                                                                        | 85.95(17) | O(4)-Zn(1)-O(3)    | 73.43(19)  |
| O(7)-Zn(1)-O(3)                                                                                          | 87.87(18) | O(6)-Zn(1)-O(3)    | 163.26(19) |
| Symmetry transformations used to generate equivalent atoms:<br>#I -x+1,y+1/2,-z+1    #II -x+1,y-1/2,-z+1 |           |                    |            |

**Table S2.** H-bond distances (Å) and angles (°) in CCPs 1-4

| CCP-1                                                                                                                                                 |        |          |          |        |
|-------------------------------------------------------------------------------------------------------------------------------------------------------|--------|----------|----------|--------|
| D-H...A                                                                                                                                               | d(D-H) | d(H...A) | d(D...A) | <(DHA) |
| O(6)-H(61)...O(4)#V                                                                                                                                   | 0.85   | 1.83     | 2.661(4) | 163.7  |
| O(6)-H(62)...O(2)#IV                                                                                                                                  | 0.85   | 1.90     | 2.744(5) | 179.1  |
| Symmetry transformations used to generate equivalent atoms:<br>#I -x,y-1/2,-z+1    #II x-1,y,z-1    #III x+1,y,z+1    #IV -x,y+1/2,-z+1    #V x,y,z-1 |        |          |          |        |
| CCP-2                                                                                                                                                 |        |          |          |        |
| D-H...A                                                                                                                                               | d(D-H) | d(H...A) | d(D...A) | <(DHA) |
| O(6)-H(61)...O(4)#V                                                                                                                                   | 0.85   | 1.83     | 2.664(4) | 163.8  |
| O(6)-H(62)...O(2)#IV                                                                                                                                  | 0.85   | 1.91     | 2.756(4) | 179.1  |

|                                                                                                                                                                                    |         |          |          |         |
|------------------------------------------------------------------------------------------------------------------------------------------------------------------------------------|---------|----------|----------|---------|
| Symmetry transformations used to generate equivalent atoms:<br>#I -x+2,y+1/2,-z+1   #II x+1,y,z+1   #III x-1,y,z-1   #IV -x+2,y-1/2,-z+1   #V x,y,z+1                              |         |          |          |         |
| CCP-3                                                                                                                                                                              |         |          |          |         |
| D-H...A                                                                                                                                                                            | d(D-H)  | d(H...A) | d(D...A) | <(DHA)  |
| O(6)-H(61)...O(3)#III                                                                                                                                                              | 0.85    | 1.96     | 2.784(3) | 164.3   |
| O(6)-H(62)...O(5)#IV                                                                                                                                                               | 0.85    | 1.78     | 2.626(3) | 176.6   |
| O(7)-H(71)...O(3)#V                                                                                                                                                                | 0.85    | 2.05     | 2.888(3) | 166.8   |
| O(7)-H(71)...O(2)#V                                                                                                                                                                | 0.85    | 2.47     | 3.135(3) | 135.9   |
| O(7)-H(72)...O(3)#VI                                                                                                                                                               | 0.85    | 1.88     | 2.723(3) | 170.6   |
| Symmetry transformations used to generate equivalent atoms:<br>#I -x,y-1/2,-z+1   #II -x,y+1/2,-z+1   #III -x+1,y-1/2,-z+2   #IV -x+1,y-1/2,-z+1<br>#V -x,y-1/2,-z+2   #VI x,y-1,z |         |          |          |         |
| CCP-4                                                                                                                                                                              |         |          |          |         |
| D-H...A                                                                                                                                                                            | d(D-H)  | d(H...A) | d(D...A) | <(DHA)  |
| O(6)-H(101)...O(5)#III                                                                                                                                                             | 0.82    | 1.97     | 2.725(8) | 152.7   |
| O(7)-H(104)...O(5)#IV                                                                                                                                                              | 0.82    | 2.03     | 2.781(6) | 152.8   |
| O(7)-H(103)...O(2)#V                                                                                                                                                               | 0.84(2) | 1.80(3)  | 2.627(6) | 168(7)  |
| O(6)-H(102)...O(5)#VI                                                                                                                                                              | 0.85(2) | 2.15(6)  | 2.879(7) | 144(10) |
| O(6)-H(102)...O(4)#VI                                                                                                                                                              | 0.85(2) | 2.36(6)  | 3.121(7) | 150(9)  |
| Symmetry transformations used to generate equivalent atoms:<br>#I -x+1,y+1/2,-z+1   #II -x+1,y-1/2,-z+1   #III x,y+1,z   #IV -x,y+1/2,-z<br>#V -x,y+1/2,-z+1   #VI -x+1,y+1/2,-z   |         |          |          |         |



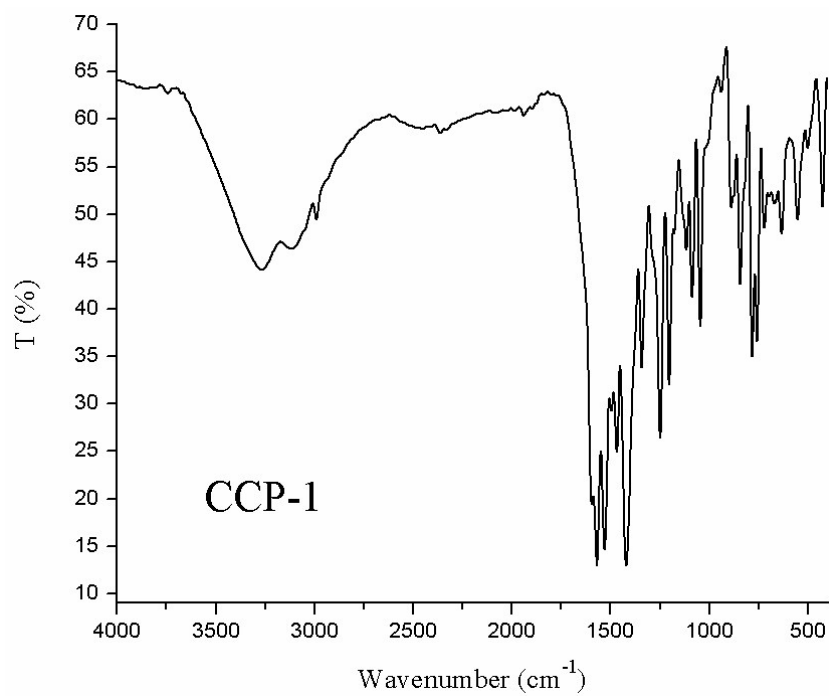

**Figure S1.** The IR spectra of CCP-1

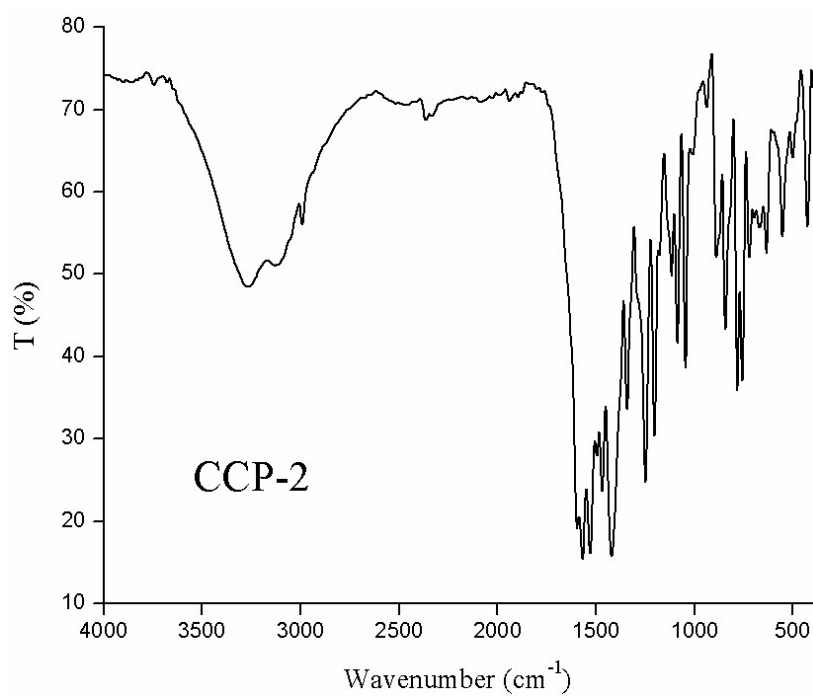

**Figure S2.** The IR spectra of CCP-2

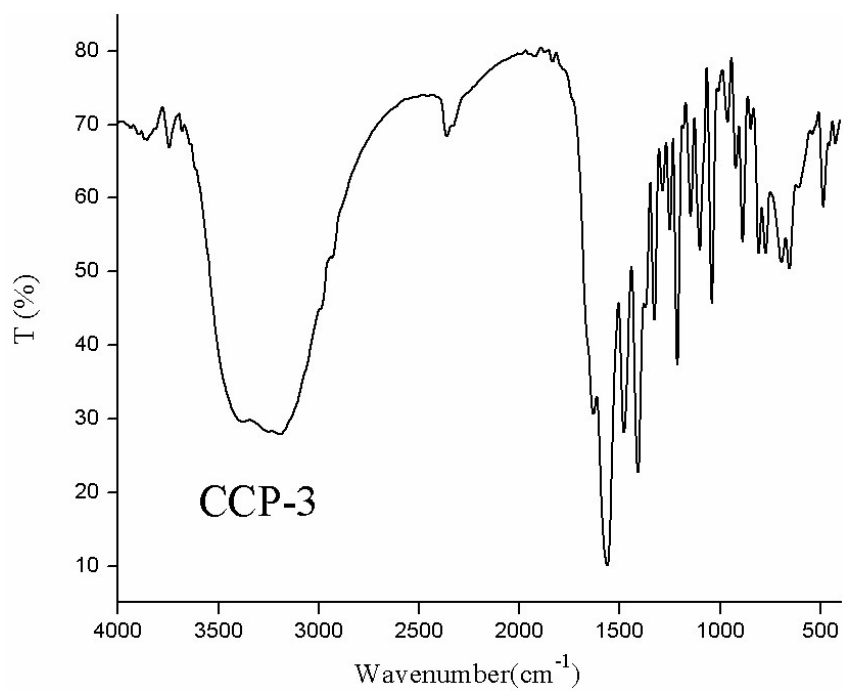

**Figure S3.** The IR spectra of CCP-3

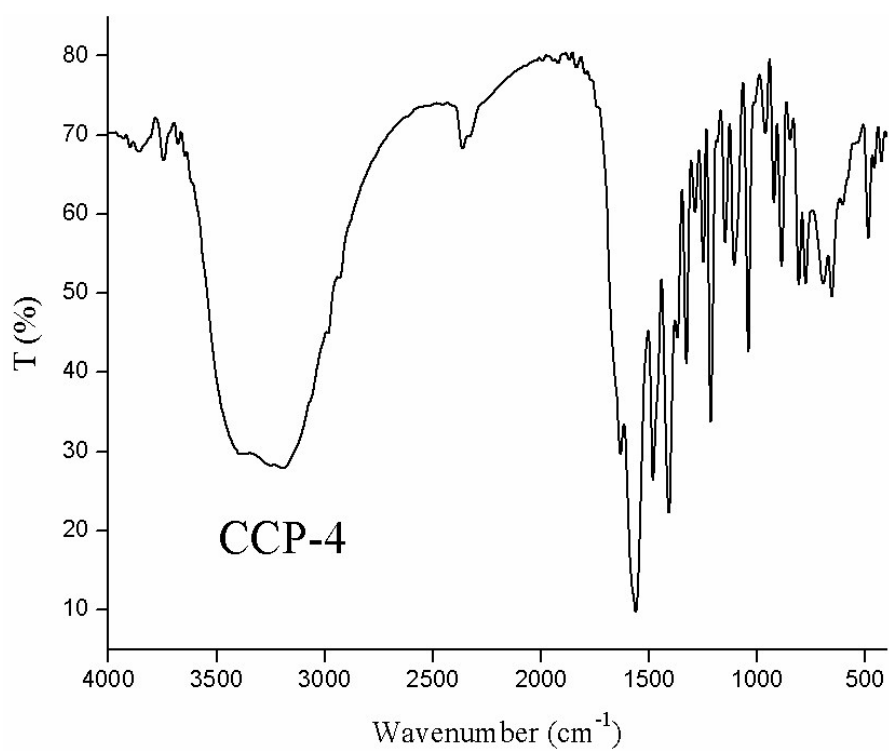

**Figure S4.** The IR spectra of CCP-4

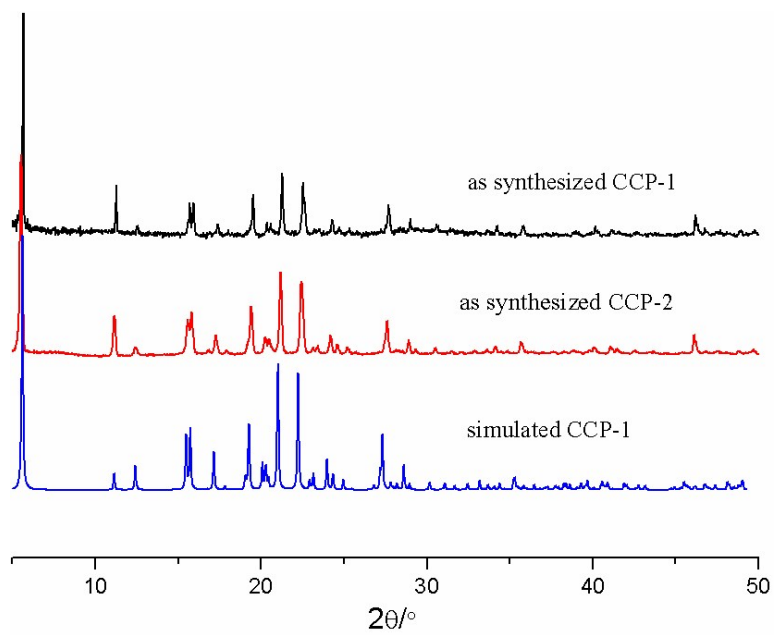

**Figure S5.** PXRD patterns of **CCP-1** and **CCP-2**

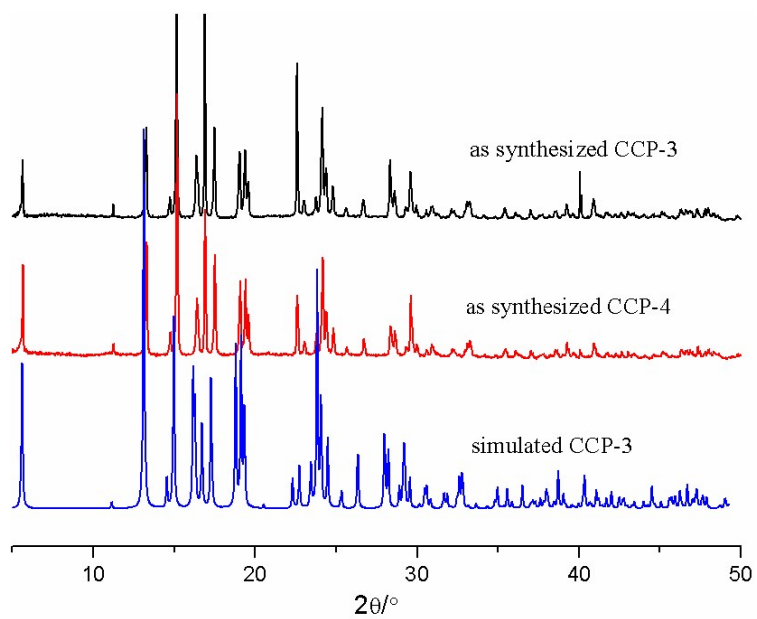

**Figure S6.** PXRD patterns of **CCP-3** and **CCP-4**

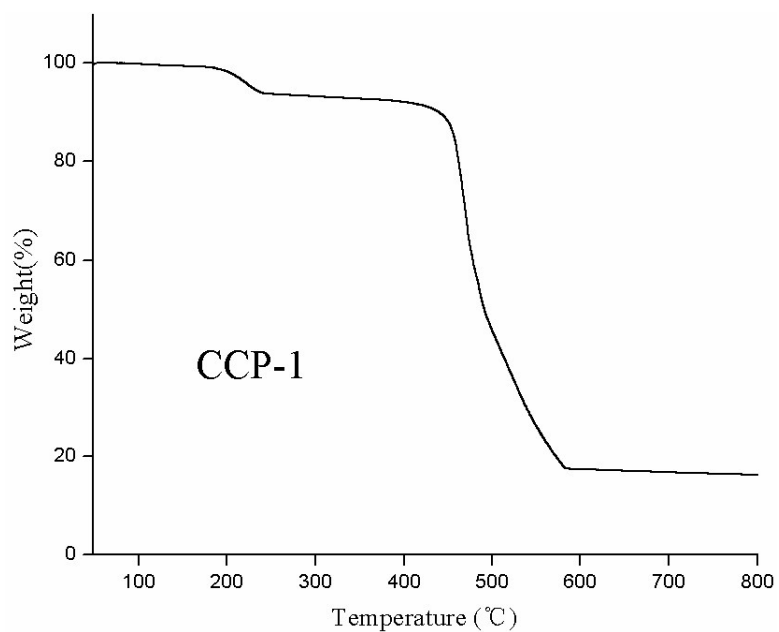

**Figure S7.** TGA curves of **CCP-1**

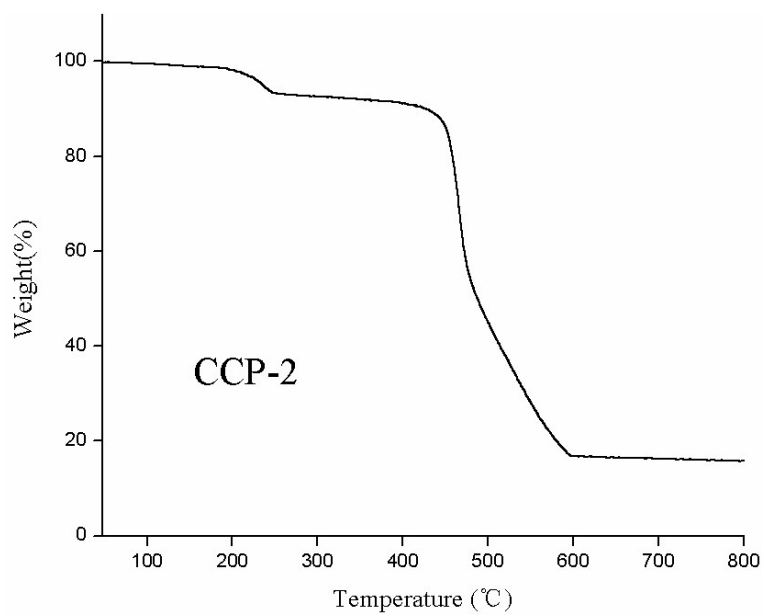

**Figure S8.** TGA curves of **CCP-2**

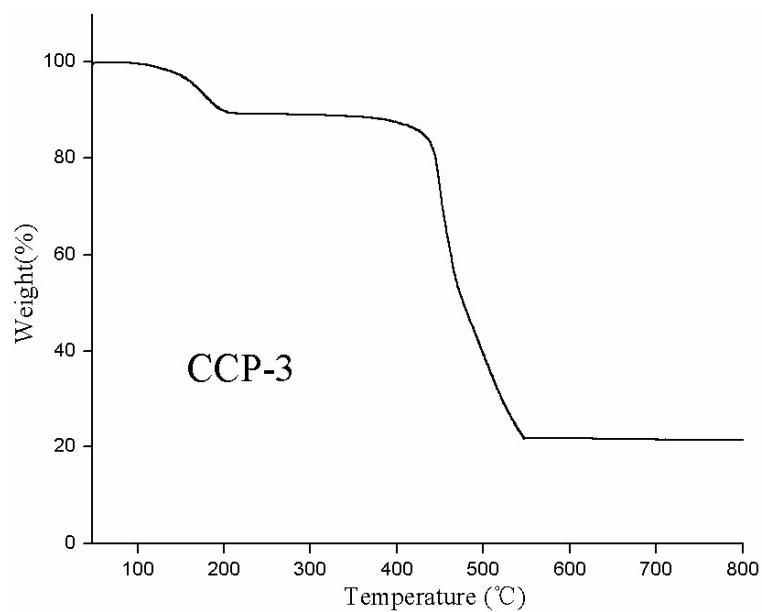

**Figure S9.** TGA curves of **CCP-3**

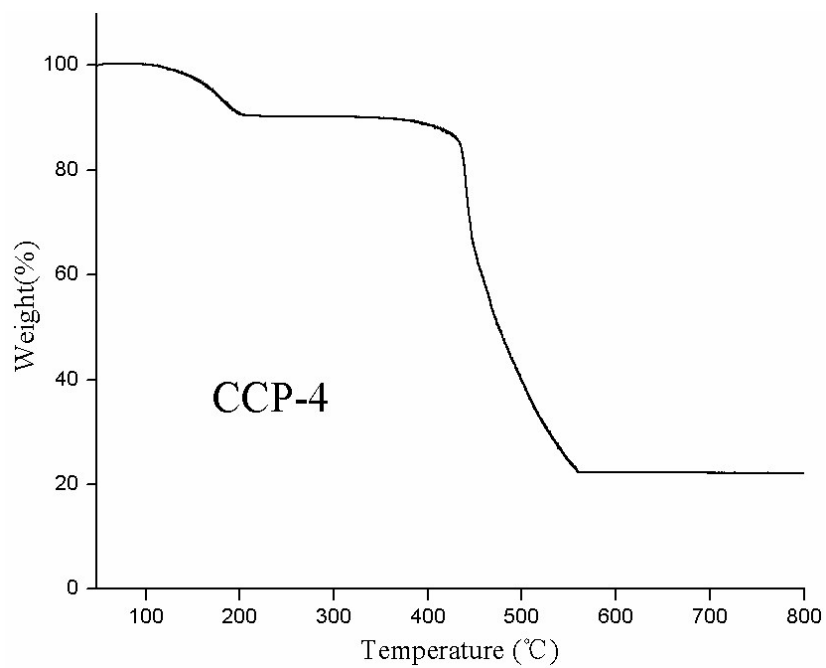

**Figure S10.** TGA curves of **CCP-4**

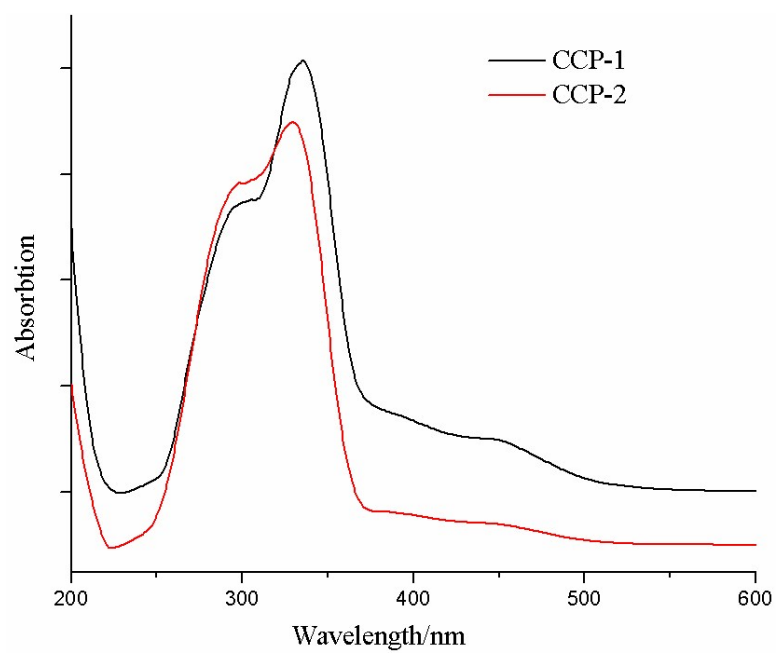

**Figure S11.** Solid-state UV-Vis of CCP-1 and CCP-2

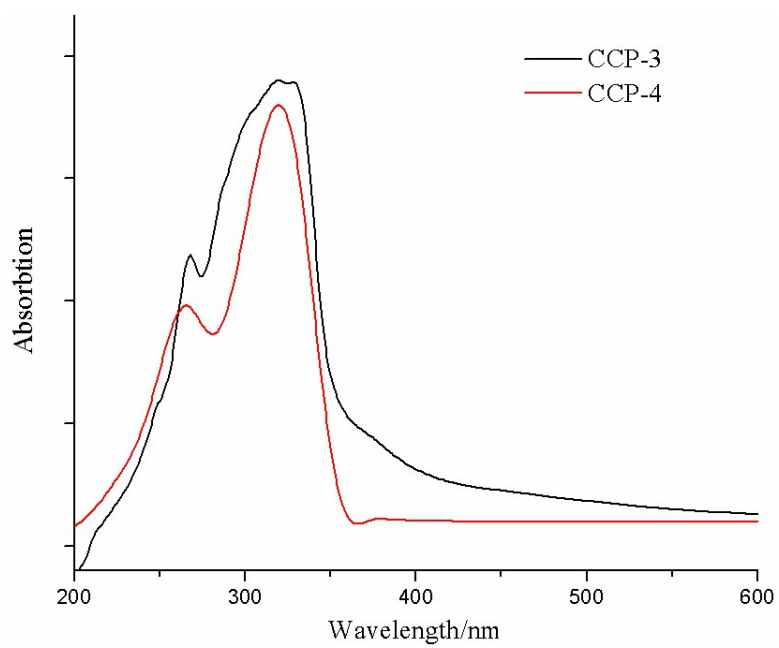

**Figure S12.** Solid-state UV-Vis of CCP-3 and CCP-4

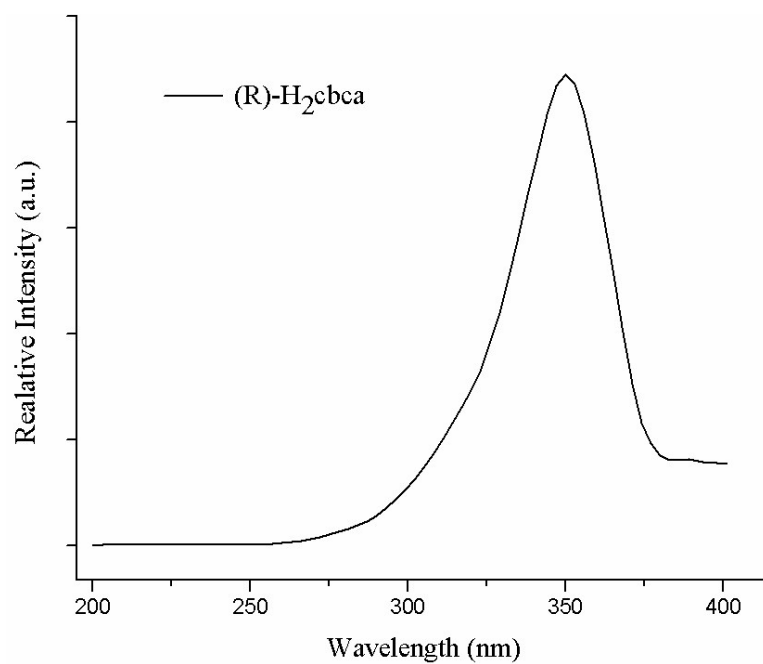

**Figure S13.** Excitation spectra of (R)-H<sub>2</sub>cbca

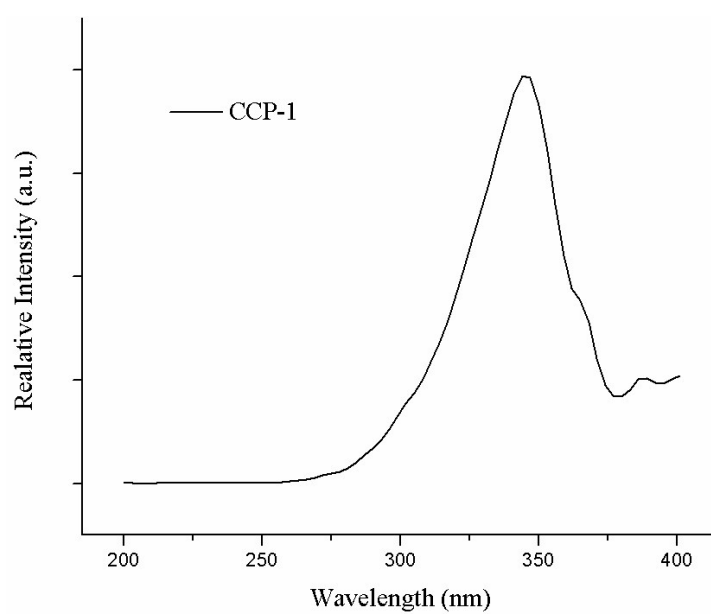

**Figure S14.** Excitation spectra of CCP-1

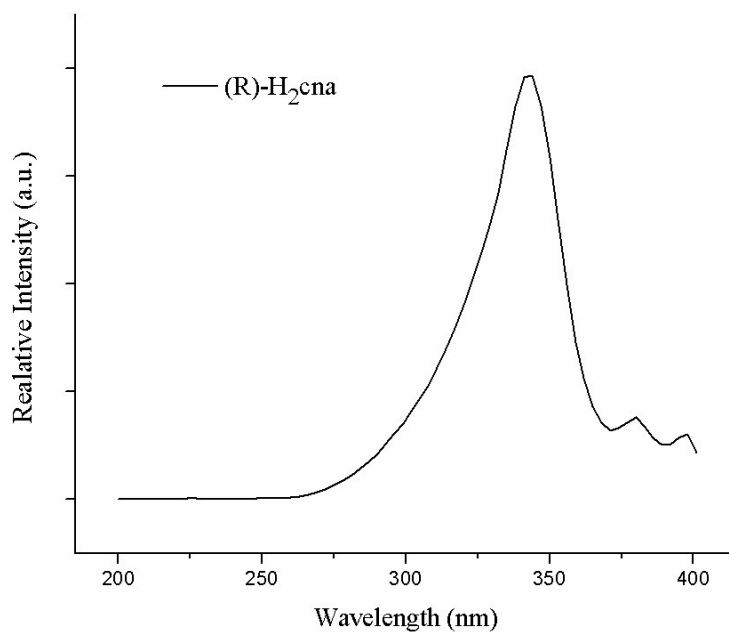

**Figure S15.** Excitation spectra of (R)-H<sub>2</sub>cna

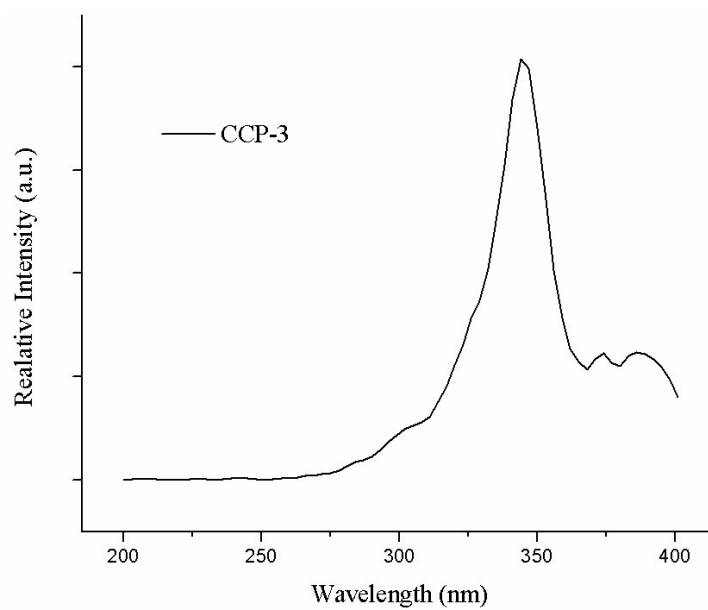

**Figure S16.** Excitation spectra of CCP-3
